# Supplementary material for: Altered glycosylation of exported proteins, including surface immune receptors, compromises calcium and downstream signaling responses to microbe-associated molecular patterns in Arabidopsis thaliana
Source: PubMed Central journal article supplement (PMC4730752; doi:10.1186/s12870-016-0718-3), 2016-01-28
Supplement: 12870_2016_718_MOESM3_ESM.pdf [file 12870_2016_718_MOESM3_ESM.pdf]

**Table S2: Primers used in this work**

| Gene/AGI code | Primer                   | Sequence (5'→ 3')                   | used for                             | sqPCR cycle # |
|---------------|--------------------------|-------------------------------------|--------------------------------------|---------------|
| At2G46060     | AT2G46060-1-F            | CAAGTTGAAAGTGAGGTTTCAGA             | PCR                                  |               |
| At2G46060     | AT2G46060-1-R            | TTGTGGGCAGCAAATCTACA                | PCR                                  |               |
| At2G46060     | SAT2G46060-1-1           | AAGGGAGAGAATATTTACCCATCA            | sequencing                           |               |
| At2G46060     | SAT2G46060-1-2           | TGATGCAGCTCTCAACTACCC               | sequencing                           |               |
| At2G46060     | AT2G46060-2-F            | AAGTTGCTGACGATGGGTTC                | PCR                                  |               |
| At2G46060     | AT2G46060-2-R            | CGAAAATTCTCTCGAGTGATGA              | PCR                                  |               |
| At2G46060     | SAT2G46060-2-1           | CTCGAGCCTGAAAGTGAAGC                | sequencing                           |               |
| At2G46060     | SAT2G46060-2-2           | ACCATTTTCCCCTGAGTCCT                | sequencing                           |               |
| At2G46060     | AT2G46060-3-F            | AATCGGCGTAAGTCAGGAAA                | PCR                                  |               |
| At2G46060     | AT2G46060-3-R            | TCACAGCTTTATTGGCCTTG                | PCR                                  |               |
| At2G46060     | SAT2G46060-3-1           | CCTGTCGAGCATGTTCAATG                | sequencing                           |               |
| At2G46060     | AT2G46060-4-1-F          | CTTGCGCTGATTCTTTTCCT                | PCR                                  |               |
| At2G46060     | AT2G46060-4-1-R          | TCAAAAGCATATCGGCATTG                | PCR                                  |               |
| At2G46060     | SAT2G46060-4-F           | CGAAAGCTGGTCGATGGTAT                | sequencing                           |               |
| At2G46060     | SAT2G46060-4-R           | ATGAGCTGCCTTAACCCAAA                | sequencing                           |               |
| At2G47760     | AT2G47760-1-F            | GGACGATTGCGATGCTTATT                | PCR                                  |               |
| At2G47760     | AT2G47760-1-R            | TCACTCCCATCATAAACAGACAA             | PCR                                  |               |
| At2G47760     | SAT2G47760-1             | CAAGAAGCCCAATAGGCTCA                | sequencing                           |               |
| At2G47760     | AT2G47760-2-F            | TTGCAGATTCTTTTTGGTGTTC              | PCR                                  |               |
| At2G47760     | AT2G47760-2-R            | TTTAGATTTGGCGGGAGAGA                | PCR                                  |               |
| At2G47760     | SAT2G47760-2             | GATCATCTACGTGAAGACTGATGTG           | sequencing                           |               |
| At2G47760     | AT2G47760-3-F            | GGGACTGCCGTTTCTGATAA                | PCR                                  |               |
| At2G47760     | AT2G47760-3-R            | AATTGCCGCCAAATTACAAA                | PCR                                  |               |
| At2G47760     | SAT2G47760-3             | GCCTTTGATCTTGGACGTGT                | sequencing                           |               |
| At2G47760     | ALG3-GTWY-R2             | TTATGCTTTTTTGTGTATTTGGGATTTAGGGTGTT | cloning                              |               |
| At2G47760     | ALG3-GTWY-F <sub>a</sub> | CACCATGGCGGGCGCCTCATC               | cloning                              |               |
| At2G47760     | alg3-4 F                 | ATGCAATCCTAGTCGCACTTATTA            | verification of crossings with T-DNA |               |

|                      |              |                                |                                                   |    |
|----------------------|--------------|--------------------------------|---------------------------------------------------|----|
|                      |              |                                | lines                                             |    |
| At2G47760            | alg3-5 R     | GATTGACAATGTAGAGAACACCAAAAA    | verification of crossings with T-DNA lines        |    |
| At2G47760            | alg3-6 F     | TCTCTTTAATGATTGTTTTGCCAT       | verification of crossings with T-DNA lines        |    |
| At2G47760            | alg3-7 R     | ATCAAAGGCGTTTGCTATGTATGAAA     | verification of crossings with T-DNA lines        |    |
| -                    | LBd1         | CCACGTTCTTTAATAGTGGACT         | verification of crossings with T-DNA lines        |    |
| At2G47760            | ALG3 semiQ F | TGCTGATGCAATCCTAGTCG           | sqRT-PCR                                          | 30 |
| At2G47760            | ALG semiQ R  | TAGTGCAGAGAGCGAGCAAA           | sqRT-PCR                                          | 30 |
| At1G07940            | EF1A-s       | TCACATCAACATTGTGGTCATTGGC      | sqRT-PCR                                          | 25 |
| At1G07940            | EF1A-as      | TTGATCTGGTCAAGAGCCTCAAG        | sqRT-PCR                                          | 25 |
| At2G47760            | AtALG3-Fw    | ATTGGATCCATGGCGGGCGCCTCATCACCG | RT-PCR, <i>Bam</i> HI site for cloning into pYES2 | 30 |
| At2G47760            | AtALG3-Re    | ATTCTCGAGTTATGCTTTTTTGTGTATTTG | RT-PCR, <i>Xho</i> I site for cloning into pYES2  | 30 |
| <i>S. cerevisiae</i> | ACT1         | AGAGTTGCCCCAGAAGAACA           | RT-PCR                                            | 30 |
| <i>S. cerevisiae</i> | ACT1         | GGCTTGGATGGAAACGTAGA           | RT-PCR                                            | 30 |
